# Supplementary material for: Novel Pathogenic Variants in the Gene Encoding Stereocilin (STRC) Causing Non-Syndromic Moderate Hearing Loss in Spanish and Argentinean Subjects
Source: MDPI journal article supplement (doi:10.3390/biomedicines11112943), 2023-10-31
Supplement: s1 [file s1]

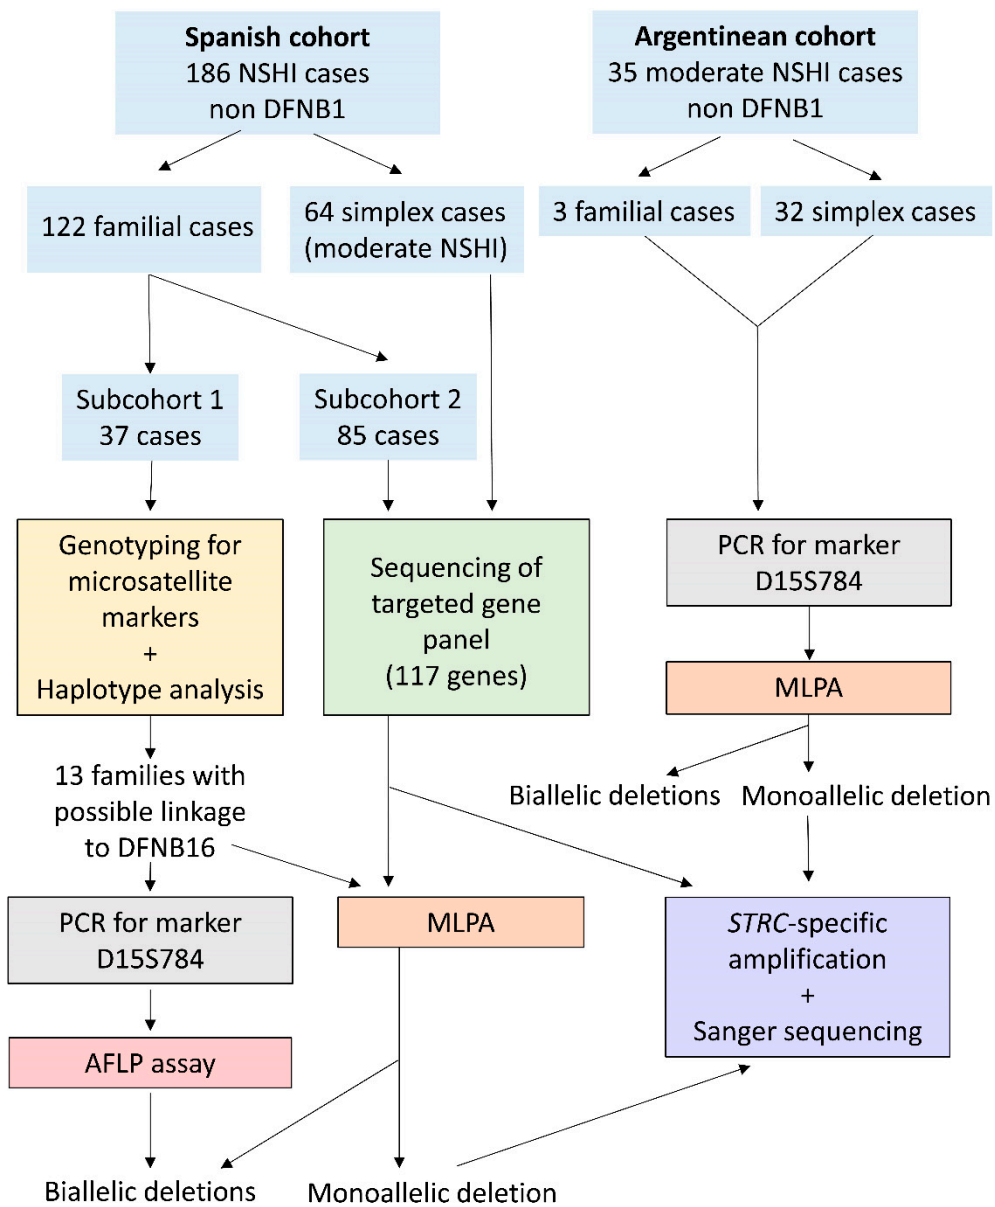

**Figure S1.** Diagram of the study setup.

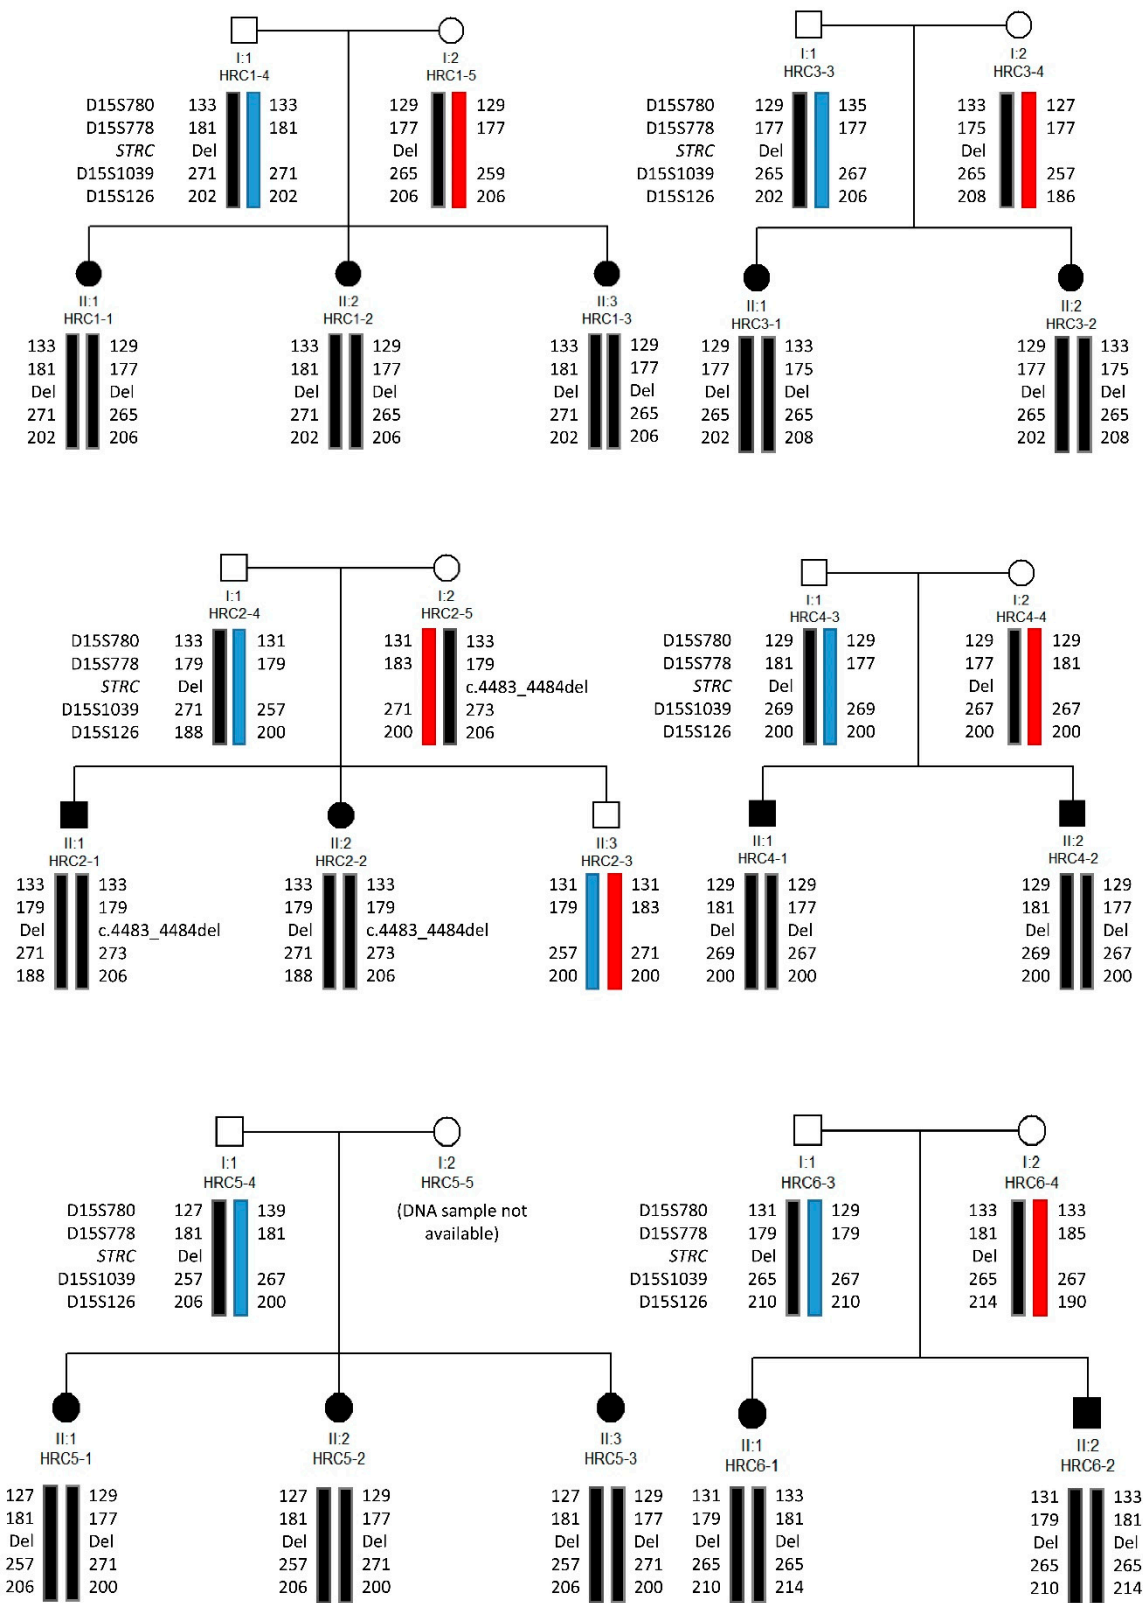

**Figure S2.** Pedigrees of the six families with biallelic pathogenic variants in the *STRC* gene for which haplotype analysis was performed. Haplotypes are indicated by vertical bars. In black, the haplotype associated with the disease. The four microsatellite markers that were genotyped and the position of the *STRC* gene are indicated on the left of the first subject in each family. Numbers indicate allele size, using as reference the genotype of CEPH subject 134702 (D15S780: 127/133; D15S778: 179/181; D15S1039: 267/267; D15S126: 188/202) [10, 11].

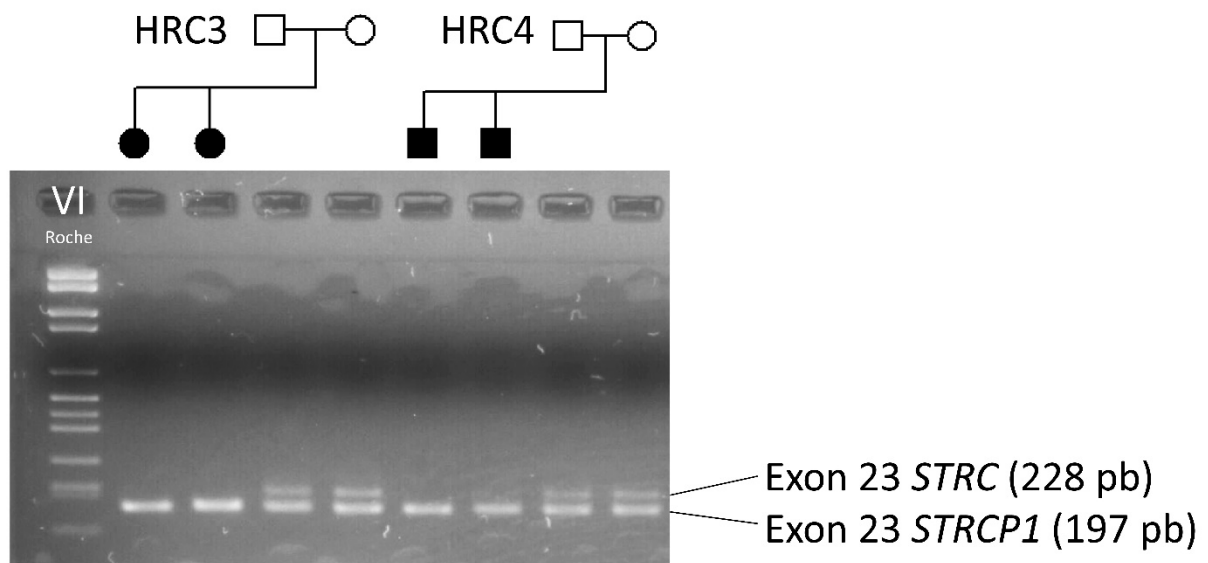

**Figure S3.** Example of AFLP test for the 3' end of intron 22 in *STRC* and *STRCP1*. PCR products were resolved on a 2.5% agarose gel. Affected subjects of families HRC3 and HRC4 show only the band corresponding to *STRCP1*, whereas their parents show the two bands, corresponding to *STRC* and *STRCP1*, respectively.

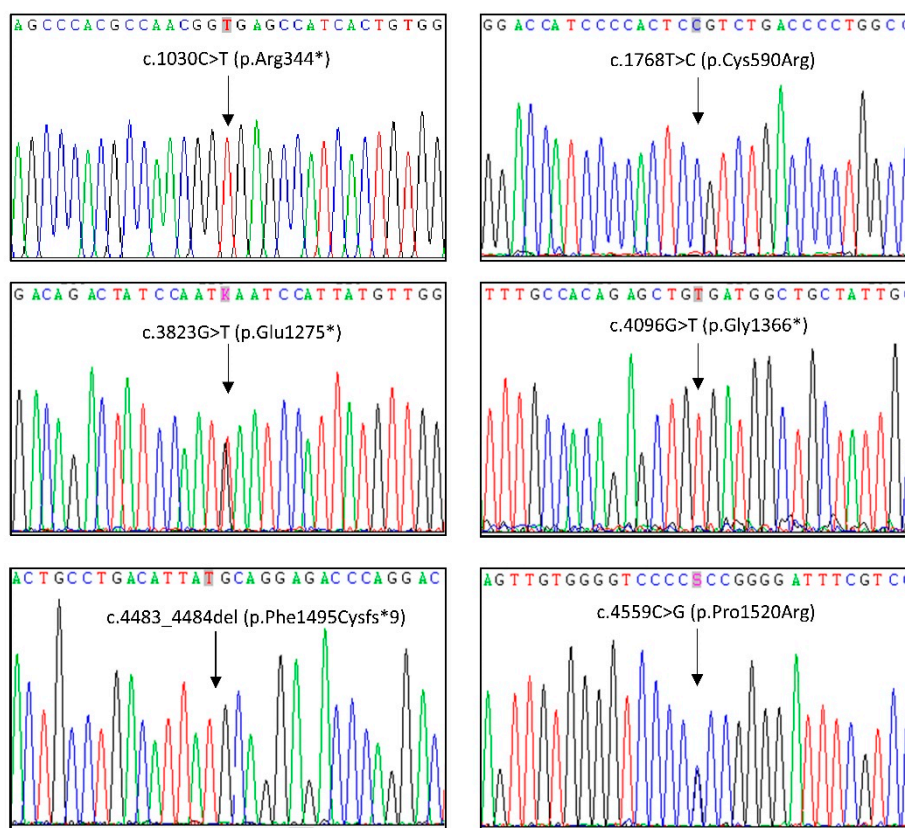

**Figure S4.** Electropherograms of the pathogenic SNVs in *STRC* that were found in this study.



**Table S1.** Primer sequences for Sanger sequencing of the *STRC* gene.

| <b>Amplicon</b> | <b>Upper primer (5'→3')</b> | <b>Lower primer (5'→3')</b>   |
|-----------------|-----------------------------|-------------------------------|
| STRC_EX1        | TCCCCTATCATTAGTCCCTCTCACA   | CACAAGTCTCTGCCTCTCTCCTTTG     |
| STRC_EX2F1      | GCTCAGGGGCAGGGTTGAG         | GTCAGCAGCCAGGACACAGTCA        |
| STRC_EX2F2_EX3  | TGGACTTGTGGAGGTGCTGCT       | CAGCTCTTCACCTCCAGATTTTCC      |
| STRC_EX4F1      | GCTTGCCATGCCCCCTTGAG        | GTCGCTCAGCCCACAGAGTCTC        |
| STRC_EX4F2      | CTGCTCCCACCCCCTACCA         | GCGTGTGGGGTGAGCAAGA           |
| STRC_EX4F3      | TCTGACCCCTGGCCCCCTTC        | GCTTTCCTCTGGCAGAGCAC          |
| STRC_EX5_EX6    | TGCAGGAGAGACAGAGAAGACAGCT   | GAGATGCTCAGTATCCCTGCCATT      |
| STRC_EX7        | GCTTGCTTTAGTGGGAGGAGGAA     | ACCGTGACAGGAGCAGGAGGA         |
| STRC_EX8_EX9    | AGGGCTACAGAGGGTCAGAGGAA     | TGACAGCTGTGCCTTCCTCTCTC       |
| STRC_EX10       | GTGCCCCTGTGTAGTGGTGTAGTGT   | AACAGGTAAGAATGGCCATGGAGT      |
| STRC_EX11       | TGGGAAATTCAGATGTGGGATTAGA   | GCGTCCTCCTGCAGACAGAGTT        |
| STRC_EX12_EX13  | TTGCCTTAGGAACCCACTTAGGAC    | GATGCCTTCCTCCCAACCAGA         |
| STRC_EX14       | GTGGCAAGGAGGATGAGATAATCAG   | ACCAGAACTCTCAGGGCCACTG        |
| STRC_EX15       | CCCCATGGTTCCTTTCTCTGA       | GGCTAAGGATAGGTAAAGAAGGTAGACTA |
| STRC_EX16       | CACAGAGTGAGGAGGCAGGACTG     | CAAAGGGAGGTGCTAGGAGAACG       |
| STRC_EX17_EX18  | ACAGGCTGTTGTATGTGTTGAATGAG  | GGGAACCAGTCAATACATAGAGCAACT   |
| STRC_EX19       | CACTAAATTTGGTCTGGGGTCACAT   | AGAGATTTCTCGGACTCCAAGAGGTAT   |
| STRC_EX20       | AGGGGGCTTGGTGTCTTGATC       | GGAACAGGCTGCCACTGATG          |
| STRC_EX21       | GCATGTCCCTCTTTTCCCCCTTCC    | GCTCACCAGTCCCCCTCTATGCA       |
| STRC_EX22       | TGCAAAACAGAGACAGGACTTTGG    | TTTGATACTCCCTGTACATCCTGCTG    |
| STRC_EX23       | TATTTCTCACAGTGCTCTATCCTCCAA | ATCTCTTGCTTCCCCCACCTCT        |
| STRC_EX24       | AATAAGCGTCTCTGTGTCTGATGCA   | GATGATCTATAGGGCTGGGTCTGTG     |
| STRC_EX25       | TCCTCAGCCTTCCCCATGACT       | AAATGAGTTCCTTCCTCCATGG        |
| STRC_EX26       | TCTCATGACCACAGCCCCCTTTC     | CTAGCCCCCTTATTTAAACACCCTCAG   |
| STRC_EX27_EX28  | AGGGCACTTTGGGAGTAGTTAGAGAA  | GAGCCAGACAGCACCAAATTAGG       |
| STRC_EX29       | ACAGGCAGAGCGCTAATTTCCA      | CGCCAGCTGATGACTCAAGATTC       |
